# Supplementary material for: All annealing-free solution-processed highly flexible organic solar cells
Source: Royal Society of Chemistry journal article supplement (doi:10.1039/d0ta11831a), 2021-01-01
Supplement: d0ta11831a1.pdf [file d0ta11831a1.pdf]

## Supplementary Information

### All Annealing-Free Solution-Processed Highly Flexible Organic Solar Cells

Juanyong Wan,<sup>‡,a,b</sup> Rongjiang Wen,<sup>‡,a,b</sup> Yonggao Xia,<sup>b,\*</sup> Mingzhi Dai,<sup>b</sup> Huihui Huang,<sup>a,\*</sup>  
Lingwei Xue,<sup>c,\*</sup> Zhiguo Zhang,<sup>c</sup> Junfeng Fang,<sup>b,d</sup> Kwun Nam Hui<sup>e</sup> and Xi Fan<sup>b,\*</sup>

<sup>a</sup>School of Physics and Electronics, Hunan University, Changsha 410082, P.R. China.

E-mail: huangh@hnu.edu.cn.

<sup>b</sup>Ningbo Institute of Materials Technology and Engineering, Chinese Academy of Sciences, Ningbo, 315201, P.R. China. E-mail: xiayg@nimte.ac.cn; fanxi@nimte.ac.cn.

<sup>c</sup>State Key Laboratory of Organic/Inorganic Composites, Beijing Advanced Innovation Center for Soft Matter Science and Engineering, Beijing University of Chemical Technology, Beijing 100029, P.R. China. E-mail: xlingwei@mail.buct.edu.cn.

<sup>d</sup>School of Physics and Electronics Science, Engineering Research Center of Nanophotonics & Advanced Instrument, Ministry of Education, East China Normal University, Shanghai 200241, P.R. China.

<sup>e</sup>Joint Key Laboratory of the Ministry of Education, Institute of Applied Physics and Materials Engineering, University of Macau, Avenida da Universidade, Taipa, Macau SAR 999078, P.R. China.

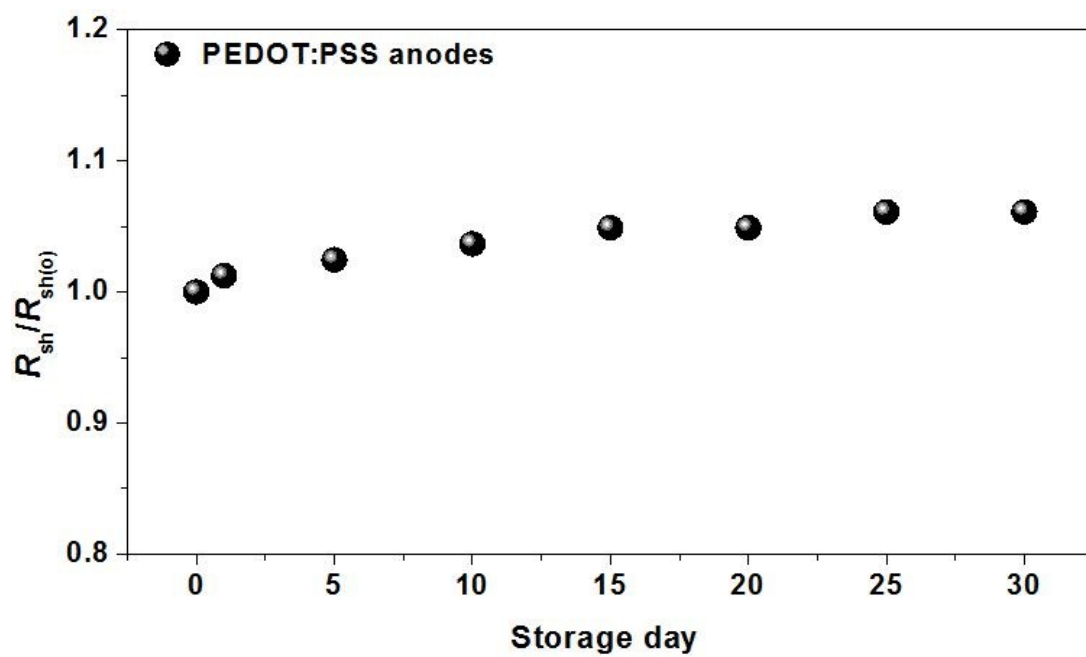

**Fig. S1**  $R_{sq}/R_{sq(0)}$  of the PEDOT:PSS anodes treated by  $\text{CF}_3\text{SO}_3\text{H}$  as a function of storage days in air atmosphere.



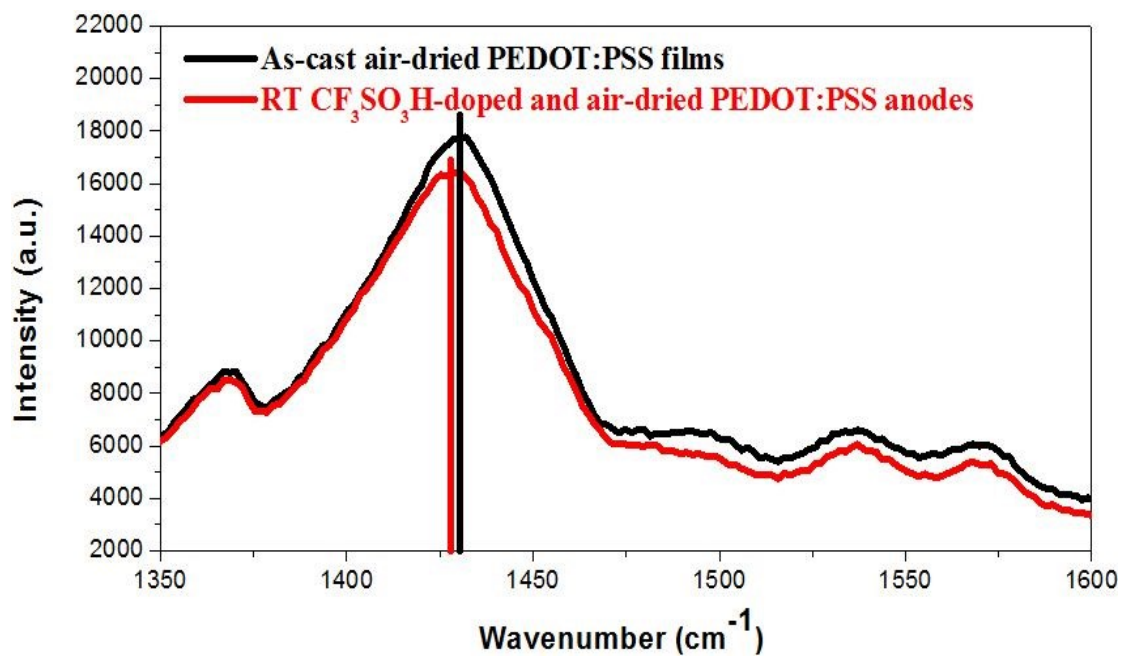

**Fig. S2** Raman spectra of the as-cast air-dried PEDOT:PSS films and the room-temperature CF<sub>3</sub>SO<sub>3</sub>H-doped and air-dried PEDOT:PSS anodes.

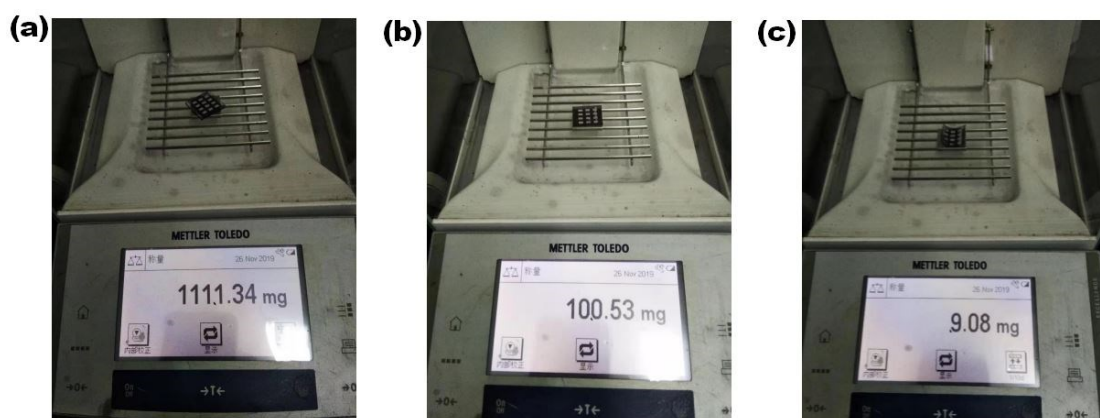

**Fig. S3** Weights of the devices including the rigid ones on glass substrates **(a)**, the flexible ones on 200- $\mu\text{m}$ -thick PET substrates **(b)** and the ultrathin soft ones on 24- $\mu\text{m}$ -thick PE substrates **(c)**.



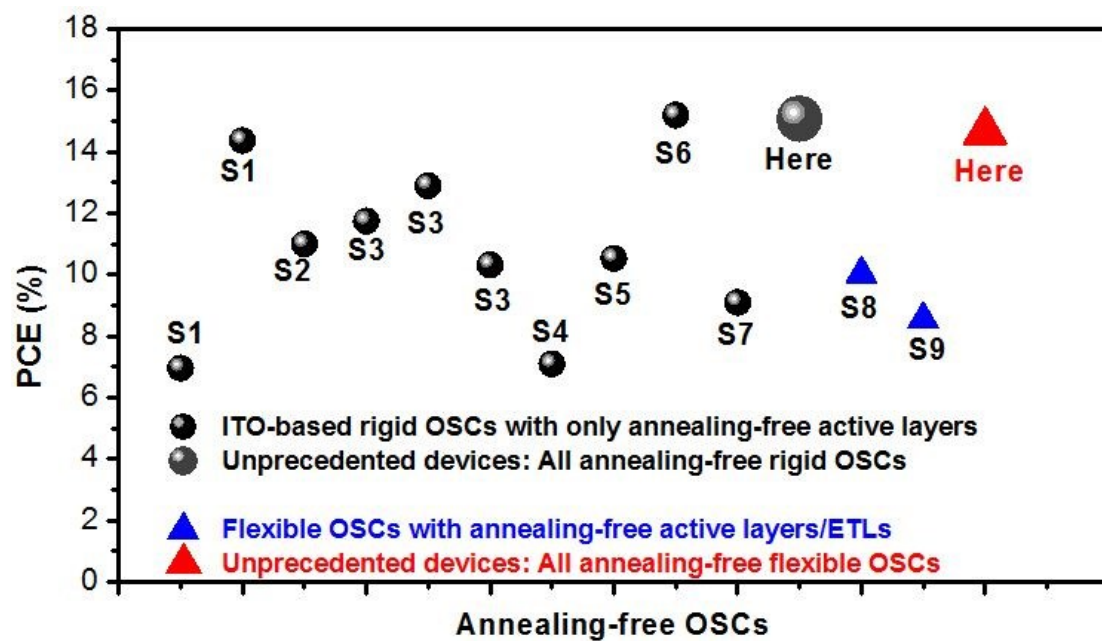

**Fig. S4** Plotted values of PCEs of the rigid and flexible OSCs with annealing-free functional layers reported recently.

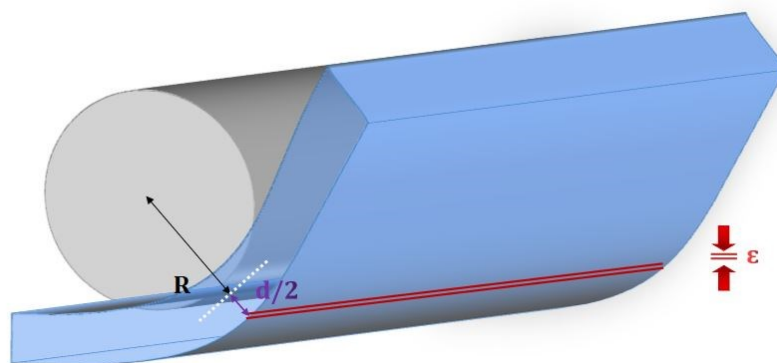

| Sample                                 | R                 | d/2               | $\epsilon$ |
|----------------------------------------|-------------------|-------------------|------------|
| PE: 24 $\mu\text{m}$ , $r$ : 0.25 mm   | 262 $\mu\text{m}$ | 12 $\mu\text{m}$  | 4.58%      |
| PET: 200 $\mu\text{m}$ , $r$ : 0.25 mm | 350 $\mu\text{m}$ | 100 $\mu\text{m}$ | 28.57%     |
| PE: 24 $\mu\text{m}$ , $r$ : 0.50 mm   | 512 $\mu\text{m}$ | 12 $\mu\text{m}$  | 2.34%      |
| PET: 200 $\mu\text{m}$ , $r$ : 0.50 mm | 600 $\mu\text{m}$ | 100 $\mu\text{m}$ | 16.67%     |

**Fig. S5** Schematic illustration of the cross-sectional dimensions. Here,  $\epsilon$  is the normal strain on the vertical cross-sectional plane,  $R$  is the radius of curvature, and  $d$  is the thickness of the PE and PET substrates, respectively.





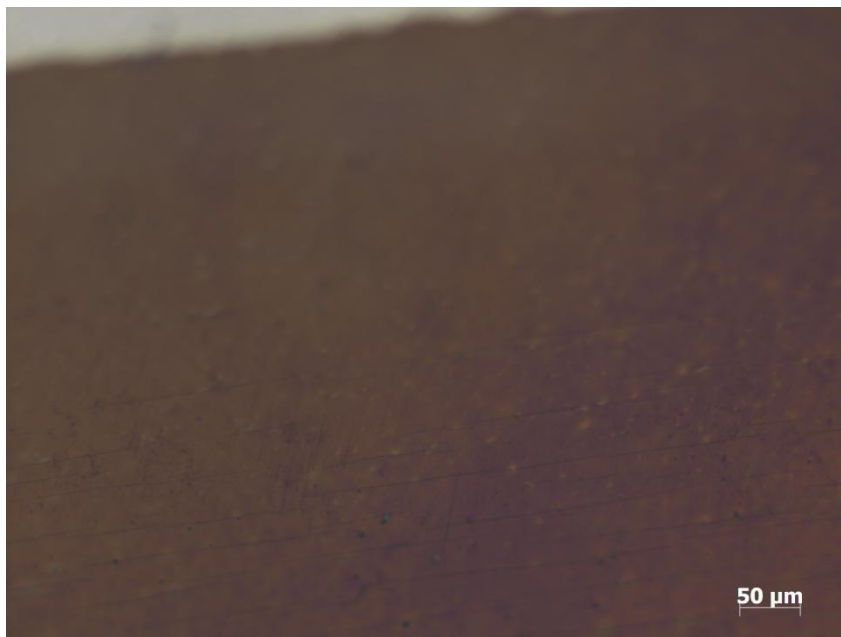

**Fig. S6** Cracks of the PM6:Y6 active blends (see bottom regions) coated on the 200- $\mu\text{m}$ -thick rigid PET substrates in a harsh flexing at  $r$  of 0.25 mm.

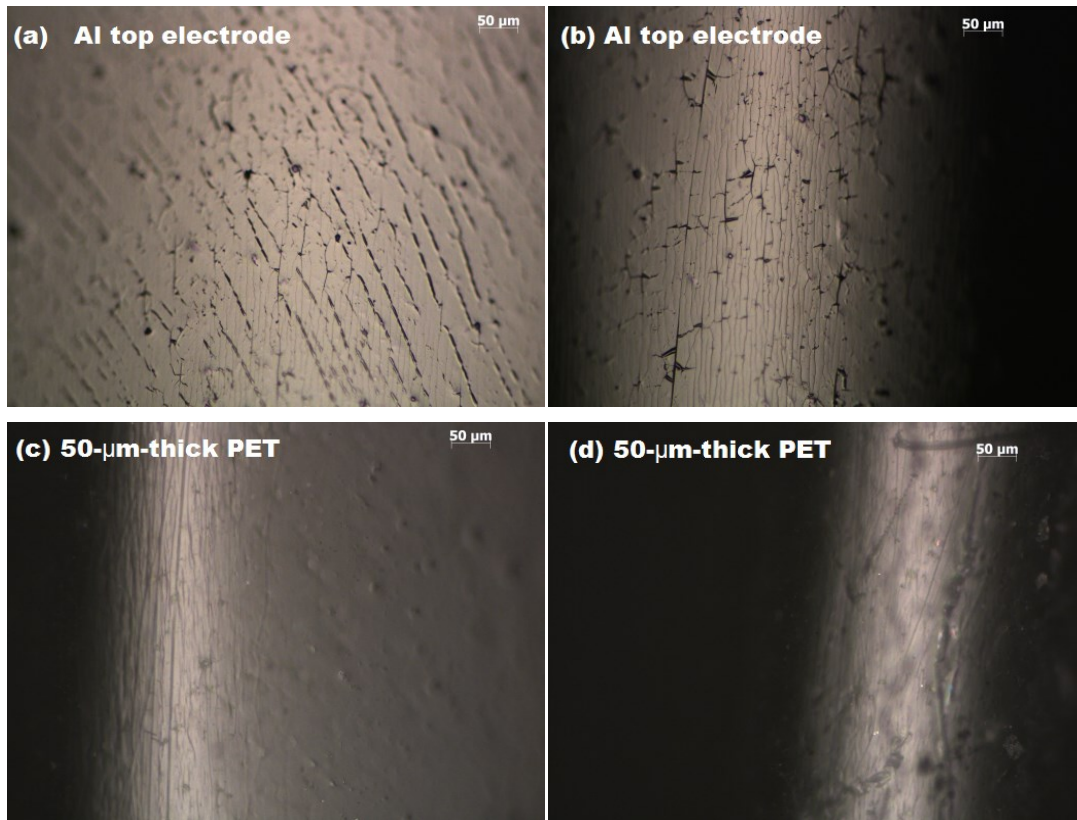

**Fig. S7** Cracks of Al top electrodes on 50- $\mu\text{m}$ -thick PET substrates and the 50- $\mu\text{m}$ -thick PET substrates in 100 cyclic flexing tests. **(a,b)** Al top electrodes with flexing at  $r$  of 0.50 and 0.25 mm, respectively. **(c,d)** The PET in the flexing at  $r$  of 0.50 mm and 0.25 mm, respectively. Scale bar: 50  $\mu\text{m}$ .

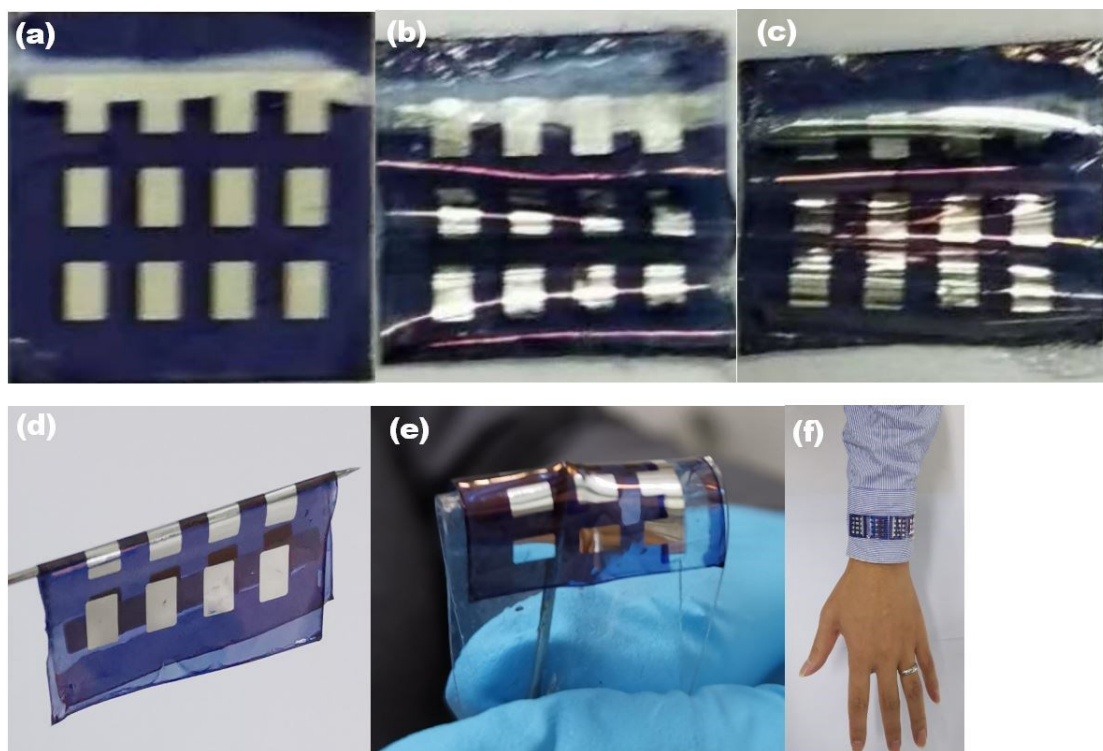

**Fig. S8 (a,b)** Pristine annealing-free solution-processed highly flexible organic solar cells. **(b,c)** Waved configuration and wrinkled configuration of the flexible devices through placing them on a pre-strained PDMS stamp (thickness: ca. 1  $\mu\text{m}$ ). **(d)** Due to the soft property, the device foils were hung on the metallic needles (radius: 0.25 mm). **(e)** The highly flexible device attached to PDMS elastomeric supports under three-dimensional deformation by pressure from a 0.2 mm-diameter metallic object. **(f)** The highly flexible devices attached to the sleeves of the shirt for a potential wearable integration in the future.

**Tab. S1** Summaries of photovoltaic characteristics of the annealing-free OSCs

| Device            | TE            | AL                                | Annealing-free components | $V_{oc}$ (V) | $J_{sc}$ (mA cm <sup>-2</sup> ) | FF (%) | PCE (%) (Ave.)   | Ref. |
|-------------------|---------------|-----------------------------------|---------------------------|--------------|---------------------------------|--------|------------------|------|
| <b>Rigid OSCs</b> | ITO/<br>Glass | PM6:C4                            | AL,TME                    | 0.689        | 15.74                           | 67.01  | 7.28<br>(6.96)   | [S1] |
|                   |               | PM6:C6                            | AL,TME                    | 0.84         | 23.82                           | 72.68  | 14.54<br>(14.37) | [S1] |
|                   |               | PBDS-T: ITIC                      | AL,TME                    | 0.985        | 18.68                           | 60.01  | 11.06            | [S2] |
|                   |               | PBDB-T:IDTCN-C                    | AL,TME                    | 0.84         | 20.33                           | 69.6   | 11.92<br>(11.75) | [S3] |
|                   |               | PBDB-T:IDTCN-O                    | AL,TME                    | 0.91         | 19.96                           | 73.2   | 13.28<br>(12.91) | [S3] |
|                   |               | PBDB-T:IDTCN-S                    | AL,TME                    | 0.85         | 19.04                           | 65.7   | 10.60<br>(10.34) | [S3] |
|                   |               | DTBDT-Rho:<br>PC <sub>71</sub> BM | AL,TME                    | 0.81         | 17.2                            | 51.0   | 7.10             | [S4] |
|                   |               | PTB7-TH:<br>PC <sub>71</sub> BM   | AL,TME                    | 0.080        | 18.74                           | 71.27  | 10.53            | [S5] |

|                  |                     |                                 |                         |       |       |       |                |      |
|------------------|---------------------|---------------------------------|-------------------------|-------|-------|-------|----------------|------|
|                  |                     | PM6:Y6                          | AL,TME                  | 0.86  | 24.3  | 73.2  | 15.2           | [S6] |
|                  |                     | PffBT-2TPF4-9/1:<br>PCBM        | AL,TME                  | 0.769 | 17.18 | 70.8  | 9.4<br>(9.1)   | [S7] |
|                  | PEDOT:PSS/<br>Glass | PM6:Y6                          | TE, HTL, AL,<br>ETL,TME | 0.840 | 24.55 | 73.1  | 15.08          | Here |
| Flexible<br>OSCs | Ag NW/<br>PET       | PTB7-Th:<br>PC <sub>71</sub> BM | ETL, AL,TME             | 0.79  | 18.51 | 68.68 | 10.04          | [S8] |
|                  | Ag NW/<br>PET       | PTB7-Th:<br>PC <sub>71</sub> BM | AL,TME                  | 0.764 | 17.4  | 64.2  | 8.75<br>(8.56) | [S9] |
|                  | PEDOT:PSS/<br>PE    | PM6:Y6                          | TE, HTL, AL,<br>ETL,TME | 0.84  | 23.92 | 0.729 | 14.66          | Here |

TE: transparent electrode; AL: active layer; HTL: hole-transport layer; ETL: electron-transport layer; TME: top metal electrode.

## References

- [1] Y. F. Han, W. Song, J. S. Zhang, L. Xie, J. B. Xiao, Y. B. Li, L. Cao, S. L. Song, E. J. Zhou, Z. Y. Ge, *J. Mater. Chem. A* **2020**, 8, 22155.
- [2] B. Huang, L. Chen, X. F. Jin, D. Cheng, Y. K. An, Q. Xie, Y. Tan, H. Lei, Y. W. Chen, *Adv. Funct. Mater.* **2018**, 28, 1800606.
- [3] Y. H. Liu, M. Li, J. J. Yang, W. Y. Xue, S. Y. Feng, J. S. Song, Z. Tang, W. Ma, Z. S. Bo, *Adv. Energy Mater.* **2019**, 9, 1901280.
- [4] H. G. Song, Y. J. Kim, J. S. Lee, Y. H. Kim, C. E. Park, S. K. Kwon, *ACS Appl. Mater. Interfaces* **2016**, 8, 34353–34359.
- [5] S. Huang, L. Duan, D. D. Zhang, *J. Mater. Chem. A*, **2020**, 8, 18792.

- [6] J. Yuan, Y.Q. Zhang, L. Y. Zhou, G. C. Zhang, H. L. Yip, T. K. Lau, X. H. Lu, C. Zhu, H. j. Peng, P. A. Johnson, M. Leclerc, Y. Cao, J. Ulanski, Y. F. Li, Y. P. Zou, *Joule* **2019**, 3, 1–12.
- [7] X. F. Liao, L. Zhang, L. Chen, X. T. Hu, Q. Y. Ai, W Ma, Y. W. Chen, *Nano Energy* **2017**, 37, 32–39.
- [8] J. W. Zhang, R. M. Xue, G. Y. Xu, W. J. Chen, G. Q. Bian, C. G. Wei, Y. W. Li, Y. F. Li, *Adv. Funct. Mater.* **2018**, 28, 1705847.
- [9] J. H. Seo, I. Hwang, H. D. Um, S. Lee, K. Lee, J. Park, H. Shin, T. H. Kwon, S. J. Kang, K. Seo, *Adv. Mater.* **2017**, 30, 1701479.
